# Supplementary material
Source: Springer Nature journal article supplement (https://www.springermedizin.de/resource/supplementary/12936_2011_1681_MOESM3_ESM.pdf/9542378)

**Bland and Altman plot of ProPlus and manual readings**

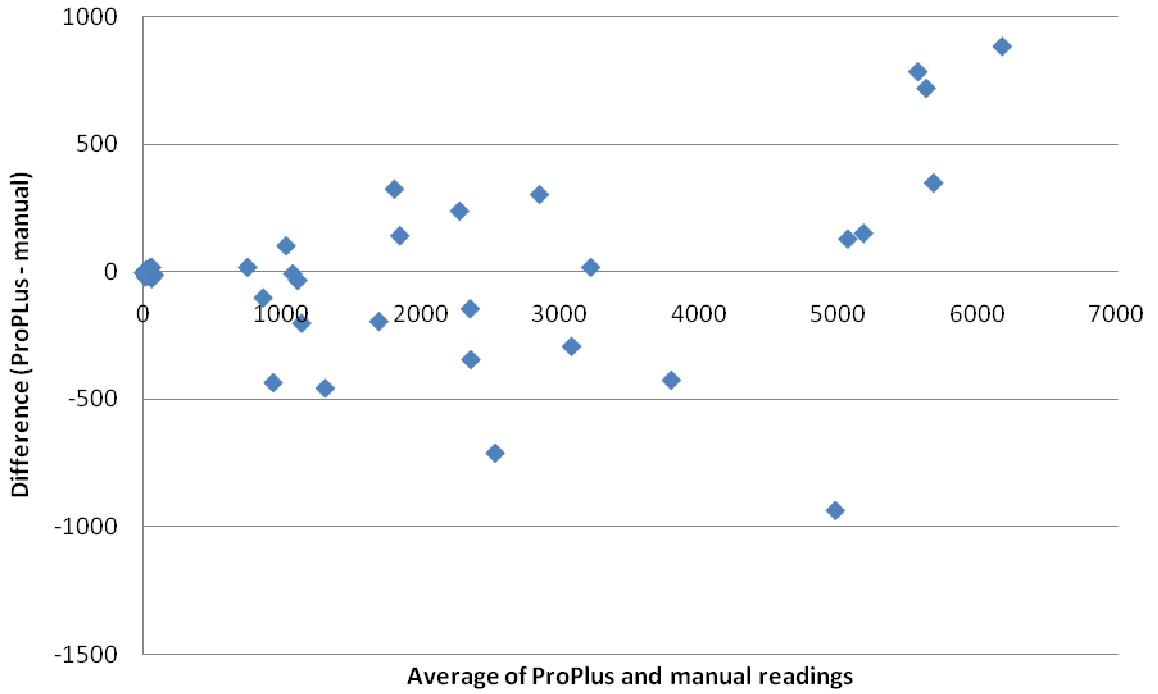

**Bland and Altman plot of SXM and manual readings**

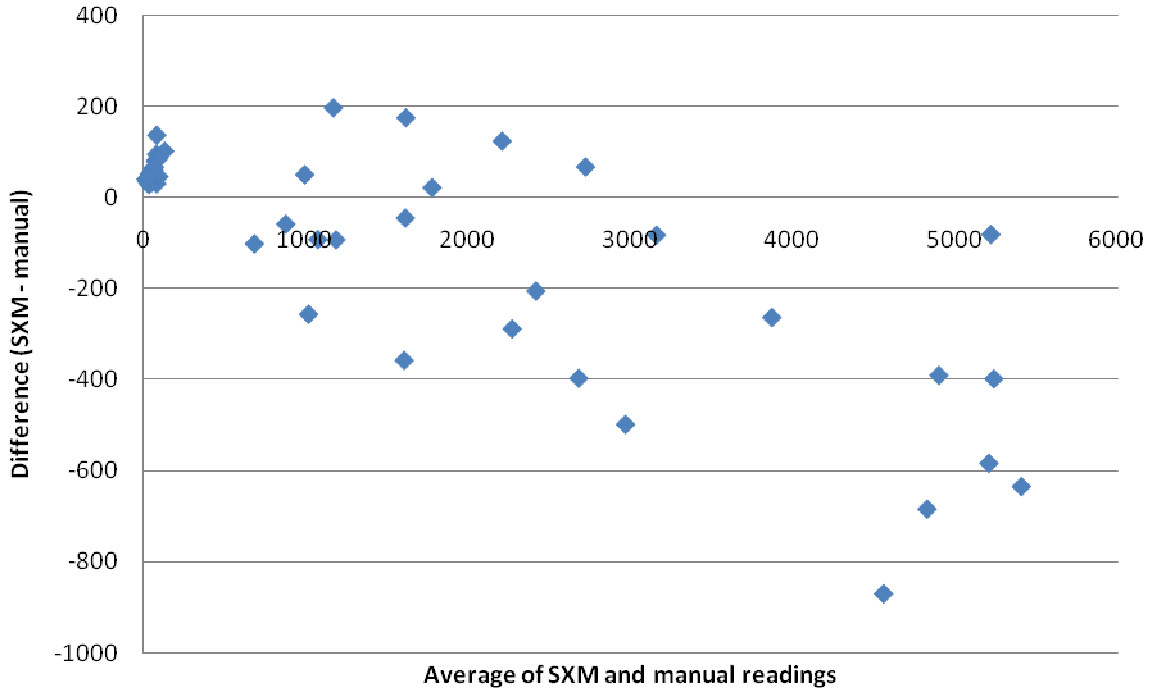

Supplement: MOESM3 [file 9542378]
